# Supplementary material
Source: Springer Nature journal article supplement (https://www.springermedizin.de/resource/supplementary/12874_2012_864_MOESM4_ESM.pdf/9432676)

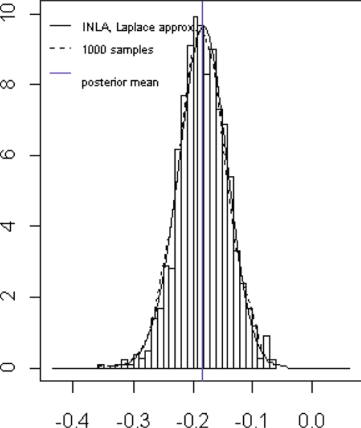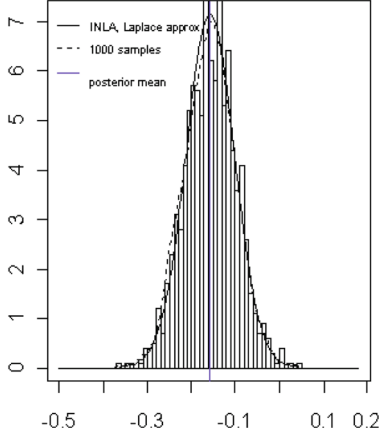

Supplement: MOESM4 [file 9432676]
